# Supplementary material for: The Epidemiology of Myeloproliferative Neoplasms in New Zealand between 2010 and 2017: Insights from the New Zealand Cancer Registry
Source: MDPI journal article supplement (doi:10.3390/curroncol28020146), 2021-04-18
Supplement: s1 [file s1]

# The Epidemiology of Myeloproliferative Neoplasms in New Zealand between 2010 and 2017: Insights from the New Zealand Cancer Registry

Chris Varghese, Tracey Immanuel, Anna Ruskova, Edward Theakston and Maggie L. Kalev-Zylinska

**Table S1.** The New Zealand Cancer Registry capture rates of patients with myeloproliferative neoplasms during 2010-2017.

| Numbers of patients registered per year | 2010      | 2011      | 2012      | 2013      | 2014      | 2015      | 2016      | 2017      | Average |
|-----------------------------------------|-----------|-----------|-----------|-----------|-----------|-----------|-----------|-----------|---------|
| All                                     | 87        | 81        | 72        | 59        | 101       | 107       | 118       | 162       | 98      |
| PV                                      | 45        | 42        | 24        | 33        | 28        | 32        | 28        | 43        | 34      |
| ET                                      | 42        | 39        | 48        | 26        | 39        | 42        | 49        | 75        | 45      |
| PMF                                     | -         | -         | -         | -         | 34        | 33        | 41        | 44        | 38      |
| New Zealand population                  | 4,351,000 | 4,384,000 | 4,408,000 | 4,442,000 | 4,510,000 | 4,596,000 | 4,693,000 | 4,794,000 |         |
| Overall capture per 100,000             | 2         | 1.85      | 1.63      | 1.33      | 2.24      | 2.33      | 2.51      | 3.38      | 2.16    |
| PV capture per 100,000                  | 1.03      | 0.96      | 0.54      | 0.74      | 0.62      | 0.70      | 0.60      | 0.90      | 0.76    |
| ET capture per 100,000                  | 0.97      | 0.89      | 1.09      | 0.59      | 0.87      | 0.91      | 1.04      | 1.56      | 0.99    |
| PMF capture per 100,000                 | -         | -         | -         | -         | 0.75      | 0.72      | 0.87      | 0.92      | 0.82    |

**Table S2.** Numbers of patients with myeloproliferative neoplasms reported to the New Zealand Cancer Registry from different New Zealand District Health Boards.

|            |                                 | <b>Overall</b> | <b>%</b> | <b>PV</b> | <b>%</b> | <b>ET</b> | <b>%</b> | <b>PMF</b> | <b>%</b> |
|------------|---------------------------------|----------------|----------|-----------|----------|-----------|----------|------------|----------|
| <b>N</b>   |                                 | 787            |          | 275       |          | 360       |          | 152        |          |
| <b>DHB</b> | <b>Canterbury</b>               | 116            | 14.7     | 37        | 13.5     | 57        | 15.8     | 22         | 14.5     |
|            | <b>Counties Manu-<br/>kau</b>   | 88             | 11.2     | 26        | 9.5      | 41        | 11.4     | 21         | 13.8     |
|            | <b>Auckland</b>                 | 78             | 9.9      | 35        | 12.7     | 34        | 9.4      | 9          | 5.9      |
|            | <b>Waitemata</b>                | 68             | 8.6      | 21        | 7.6      | 33        | 9.2      | 14         | 9.2      |
|            | <b>Southern</b>                 | 61             | 7.8      | 24        | 8.7      | 30        | 8.3      | 7          | 4.6      |
|            | <b>Waikato</b>                  | 60             | 7.6      | 16        | 5.8      | 27        | 7.5      | 17         | 11.2     |
|            | <b>MidCentral</b>               | 54             | 6.9      | 20        | 7.3      | 25        | 6.9      | 9          | 5.9      |
|            | <b>Capital and Coast</b>        | 46             | 5.8      | 21        | 7.6      | 13        | 3.6      | 12         | 7.9      |
|            | <b>Hawkes Bay</b>               | 37             | 4.7      | 11        | 4.0      | 22        | 6.1      | 4          | 2.6      |
|            | <b>Northland</b>                | 27             | 3.4      | 7         | 2.5      | 19        | 5.3      | 1          | 0.7      |
|            | <b>Taranaki</b>                 | 27             | 3.4      | 14        | 5.1      | 12        | 3.3      | 1          | 0.7      |
|            | <b>Bay of Plenty</b>            | 26             | 3.3      | 5         | 1.8      | 11        | 3.1      | 10         | 6.6      |
|            | <b>Nelson Marlbor-<br/>ough</b> | 20             | 2.5      | 13        | 4.7      | 3         | 0.8      | 4          | 2.6      |
|            | <b>South Canterbury</b>         | 17             | 2.2      | 5         | 1.8      | 6         | 1.7      | 6          | 3.9      |
|            | <b>Hutt Valley</b>              | 16             | 2.0      | 7         | 2.5      | 6         | 1.7      | 3          | 2.0      |
|            | <b>Lakes</b>                    | 16             | 2.0      | 5         | 1.8      | 6         | 1.7      | 5          | 3.3      |
|            | <b>Other</b>                    | 16             | 2.0      | 4         | 1.5      | 5         | 1.4      | 7          | 4.6      |
|            | <b>Whanganui</b>                | 14             | 1.8      | 4         | 1.5      | 10        | 2.8      | 0          | 0.0      |

DHB, District Health Board.

**Table S3.** Demographic factors of patients with myeloproliferative neoplasms reported to the New Zealand Cancer Registry.

|                                   | Overall           | Polycythaemia<br>Vera | Essential Thrombo-<br>cythaemia | Primary Myelofi-<br>brosis* | P val-<br>ue     |
|-----------------------------------|-------------------|-----------------------|---------------------------------|-----------------------------|------------------|
| N                                 | 787               | 275 (34.9%)           | 360 (45.7%)                     | 152 (19.3%)                 |                  |
| Age at diagnosis, mean (SD)       | 67.3 (15.2)       | 68.6 (15.0)           | 65.5 (16.0)                     | 69.2 (12.7)                 | <b>0.008</b>     |
| Age at diagnosis, median (IQR)    | 70.0 (59.0, 80.0) | 68.0 (55.0, 77.0)     | 69.5 (60.0, 78.0)               | 70.0 (59.0, 80.0)           |                  |
| <b>Gender (%)</b>                 |                   |                       |                                 |                             |                  |
| Female                            | 386 (49.0)        | 132 (48)              | 201 (55.8)                      | 53 (34.9)                   | <b>&lt;0.001</b> |
| Male                              | 401 (51.0)        | 143 (52)              | 159 (44.2)                      | 99 (65.1)                   |                  |
| <b>Ethnicity (%)</b>              |                   |                       |                                 |                             |                  |
| European                          | 602 (76.5)        | 202 (73.5)            | 282 (78.3)                      | 118 (77.6)                  | 0.149            |
| Maori                             | 107 (13.6)        | 47 (17.1)             | 45 (12.5)                       | 15 (9.9)                    |                  |
| Pacific Islanders                 | 37 (4.7)          | 16 (5.8)              | 11 (3.1)                        | 10 (6.6)                    |                  |
| Asian                             | 27 (3.4)          | 7 (2.5)               | 13 (3.6)                        | 7 (4.6)                     |                  |
| Other                             | 14 (1.8)          | 3 (1.1)               | 9 (2.5)                         | 2 (1.3)                     |                  |
| Numbers of patients that died (%) | 318 (40.4)        | 141 (51.3)            | 109 (30.3)                      | 68 (44.7)                   | <b>0.001</b>     |
| Age at death, mean (SD)           | 77.9 (11.1)       | 77.7 (11.2)           | 80.2 (9.8)                      | 74.8 (12.0)                 | <b>0.007</b>     |
| Age at death, median (IQR)        | 79.0 (71.0, 86.0) | 81.0 (74.4, 87.2)     | 74.6 (66.4, 84.7)               | 79.0 (71.0, 86.0)           |                  |

\*PMF diagnosis includes patients from different time periods.

**Table S4.** Comparison of baseline demographics for patients with myeloproliferative neoplasms according to their survival status.

|                                       | <b>Overall</b>    | <b>Alive*</b>     | <b>Dead*</b>      | <b>P value</b>   |
|---------------------------------------|-------------------|-------------------|-------------------|------------------|
| <b>N (%)</b>                          | 787               | 469 (59.6%)       | 318 (40.4%)       |                  |
| <b>Age at diagnosis, mean (SD)</b>    | 67.3 (15.2)       | 61.2 (14.4)       | 76.3 (11.3)       | <b>&lt;0.001</b> |
| <b>Age at diagnosis, median (IQR)</b> | 70.0 (59.0, 80.0) | 63.0 (53.0, 72.0) | 77.0 (69.0, 84.0) |                  |
| <b>Age at death, mean (SD)</b>        | -                 | -                 | 77.9 (11.1)       |                  |
| <b>Age at death, median (IQR)</b>     | -                 | -                 | 79.0 (71.5, 86.5) |                  |
| <b>MPN type (%)</b>                   |                   |                   |                   |                  |
| Polycythaemia vera                    | 275               | 134 (48.7)        | 141 (51.3)        | <b>&lt;0.001</b> |
| Essential thrombocythaemia            | 360               | 251 (69.7)        | 109 (30.3)        |                  |
| Primary myelofibrosis                 | 152               | 84 (55.3)         | 68 (44.7)         |                  |
| <b>Gender (%)</b>                     |                   |                   |                   |                  |
| Female                                | 386               | 247 (64.0)        | 139 (36.0)        | <b>0.017</b>     |
| Male                                  | 401               | 222 (55.4)        | 179 (44.6)        |                  |
| <b>Ethnicity (%)</b>                  |                   |                   |                   |                  |
| European                              | 602               | 343 (73.1)        | 259 (81.5)        | <b>0.002</b>     |
| Maori                                 | 107               | 64 (13.6)         | 43 (13.5)         |                  |
| Pacific Islanders                     | 37                | 27 (5.8)          | 10 (3.1)          |                  |
| Asian                                 | 27                | 23 (4.9)          | 4 (1.3)           |                  |
| Other                                 | 14                | 12 (2.6)          | 2 (0.6)           |                  |

\* As of 14 June 2019.

**Table S5.** The New Zealand Cancer Registry death rates for patients with myeloproliferative neoplasms.

| <b>Numbers of patients that died per year</b> | <b>2010</b> | <b>2011</b> | <b>2012</b> | <b>2013</b> | <b>2014</b> | <b>2015</b> | <b>2016</b> | <b>2017</b> | <b>Average</b> |
|-----------------------------------------------|-------------|-------------|-------------|-------------|-------------|-------------|-------------|-------------|----------------|
| <b>All</b>                                    | 48          | 37          | 38          | 35          | 59          | 34          | 39          | 28          | 40             |
| <b>PV</b>                                     | 30          | 24          | 18          | 22          | 20          | 14          | 8           | 5           | 18             |
| <b>ET</b>                                     | 18          | 13          | 20          | 13          | 18          | 5           | 11          | 11          | 14             |
| <b>PMF</b>                                    | -           | -           | -           | -           | 21          | 15          | 20          | 12          | 17             |
| <b>New Zealand population</b>                 | 4,351,000   | 4,384,000   | 4,408,000   | 4,442,000   | 4,510,000   | 4,596,000   | 4,693,000   | 4,794,000   |                |
| <b>Overall deaths per 100,000</b>             | 1.10        | 0.84        | 0.86        | 0.79        | 1.31        | 0.74        | 0.83        | 0.58        | 0.88           |
| <b>PV deaths per 100,000</b>                  | 0.69        | 0.55        | 0.41        | 0.50        | 0.44        | 0.31        | 0.17        | 0.10        | 0.40           |
| <b>ET deaths per 100,000</b>                  | 0.41        | 0.30        | 0.45        | 0.29        | 0.40        | 0.11        | 0.23        | 0.23        | 0.30           |
| <b>PMF deaths per 100,000</b>                 | -           | -           | -           | -           | 0.47        | 0.33        | 0.43        | 0.25        | 0.37           |
